# Supplementary material for: Assessment of the Impact of Cataract Surgery on Subjective Quality of Vision Across Different Intraocular Lens Type Using the Portuguese-Validated QoV Questionnaire
Source: Research Square preprint supplement (doi:10.21203/rs.3.rs-8855405/v1), 2026-02-19
Supplement: Supplementary file 1 [file 33b65ec09a613aad440dc6da.docx]

Table 4 – Comparison between diferent types of intraocular lenses before and after cataract surgery

|  | **1. Before surgery**, N = 58 | | | | **2. After surgery**, N = 58 | | | |
| --- | --- | --- | --- | --- | --- | --- | --- | --- |
| **Caracteristics** | **EDOF**  N = 6 | **Monofocal/**  **Monofocal Premium**  N = 11 | **Trifocal**  N = 41 | **p-value** | **EDOF**  N = 6 | **Monofocal/**  **Monofocal Premium**  N = 11 | **Trifocal**  N = 41 | **p-value** |
| UDVA |  |  |  | 0,213 |  |  |  | 0,524 |
| Mean (SD) | 7,80 (2,28) | 7,55 (1,81) | 6,20 (2,69) |  | 8,50 (1,52) | 8,55 (1,29) | 7,49 (2,66) |  |
| Median [Q1; Q3] | 8,00 [8,00; 9,00] | 7,00 [6,00; 9,00] | 7,00 [4,00; 8,00] |  | 8,50 [8,00; 10,00] | 9,00 [8,00; 10,00] | 8,00 [7,00; 10,00] |  |
| UNVA |  |  |  | 0,430 |  |  |  | **0,039** |
| Mean (SD) | 5,20 (2,39) | 3,45 (2,38) | 4,60 (3,20) |  | 6,50 (2,88) | 5,36 (2,73) | 7,66 (2,31) |  |
| Median [Q1; Q3] | 5,00 [4,00; 7,00] | 3,00 [1,00; 6,00] | 3,50 [1,50; 7,50] |  | 6,50 [5,00; 9,00] | 5,00 [3,00; 8,00] | 8,00 [7,00; 9,00] |  |
| QOV_Frequency |  |  |  | 0,178 |  |  |  | 0,282 |
| Mean (SD) | 22,72 (18,19) | 35,27 (21,29) | 23,42 (15,01) |  | 18,53 (13,86) | 24,28 (17,83) | 29,58 (18,57) |  |
| Median [Q1; Q3] | 24,81 [6,90; 28,25] | 35,48 [18,09; 51,87] | 21,36 [10,86; 34,46] |  | 15,69 [10,51; 31,87] | 21,36 [10,86; 31,87] | 24,64 [17,75; 38,09] |  |
| QOV_Severity |  |  |  | 0,202 |  |  |  | 0,305 |
| Mean (SD) | 22,94 (19,88) | 37,23 (24,19) | 24,31 (16,66) |  | 18,47 (13,54) | 23,26 (18,56) | 29,60 (18,91) |  |
| Median [Q1; Q3] | 23,61 [6,68; 26,95] | 33,87 [16,99; 60,24] | 23,44 [13,47; 33,98] |  | 16,81 [10,08; 30,35] | 16,99 [10,19; 40,00] | 26,84 [16,87; 43,71] |  |
| QOV_Bothersome |  |  |  | 0,318 |  |  |  | 0,466 |
| Mean (SD) | 28,66 (26,78) | 41,72 (29,87) | 27,38 (20,34) |  | 19,83 (16,55) | 29,18 (29,06) | 31,35 (23,12) |  |
| Median [Q1; Q3] | 26,06 [9,98; 32,69] | 34,30 [19,04; 65,88] | 25,46 [14,83; 35,47] |  | 16,73 [7,60; 36,90] | 19,04 [7,60; 39,99] | 27,61 [15,23; 42,46] |  |
| UDVA OD (logMAR) |  |  |  | 0,074 |  |  |  | 0,069 |
| Mean (SD) | 0,37 (0,37) | 0,69 (0,35) | 0,44 (0,36) |  | 0,10 (0,13) | 0,11 (0,15) | 0,04 (0,09) |  |
| Median [Q1; Q3] | 0,35 [0,00; 0,50] | 0,70 [0,30; 1,00] | 0,40 [0,10; 0,60] |  | 0,05 [0,00; 0,20] | 0,10 [0,00; 0,20] | 0,00 [0,00; 0,00] |  |
| UDVA OS (logMAR) |  |  |  | 0,058 |  |  |  | 0,113 |
| Mean (SD) | 0,30 (0,22) | 0,68 (0,36) | 0,44 (0,33) |  | 0,14 (0,10) | 0,10 (0,14) | 0,06 (0,10) |  |
| Median [Q1; Q3] | 0,25 [0,20; 0,50] | 0,70 [0,30; 0,90] | 0,40 [0,20; 0,70] |  | 0,13 [0,10; 0,20] | 0,00 [0,00; 0,20] | 0,00 [0,00; 0,10] |  |
| Spherical equivalent OD |  |  |  | 0,181 |  |  |  | 0,250 |
| Mean (SD) | -0,58 (1,38) | 0,89 (3,58) | 0,43 (1,95) |  | -0,08 (0,34) | -0,27 (0,51) | -0,04 (0,28) |  |
| Median [Q1; Q3] | 0,13 [-1,50; 0,25] | 0,50 [-0,75; 2,75] | 0,50 [0,00; 1,75] |  | -0,13 [-0,25; 0,00] | -0,25 [-0,75; 0,00] | 0,00 [0,00; 0,00] |  |
| Spherical equivalent OS |  |  |  | 0,119 |  |  |  | 0,051 |
| Mean (SD) | -0,42 (0,79) | 0,36 (3,98) | 0,62 (1,80) |  | -0,38 (0,38) | -0,20 (0,44) | -0,03 (0,30) |  |
| Median [Q1; Q3] | -0,38 [-1,00; 0,25] | 0,75 [-2,25; 2,75] | 1,00 [0,00; 1,75] |  | -0,38 [-0,50; 0,00] | 0,00 [-0,25; 0,00] | 0,00 [0,00; 0,00] |  |
| 1Teste de Kruskal-Wallis  EDOF – Extended depth of focus; UDVA – Uncorrected distance visual acuity; UNVA – Uncorrected near visual acuity; SD – Standard deviation; OD – Right eye; OS – Left Eye; QOV – Quality of vision questionnaire | | | | | | | | |
