# Supplementary material for: Assessment of the Impact of Cataract Surgery on Subjective Quality of Vision Across Different Intraocular Lens Type Using the Portuguese-Validated QoV Questionnaire
Source: Research Square preprint supplement (doi:10.21203/rs.3.rs-8855405/v1), 2026-02-19
Supplement: Supplementary file 3 [file 824621b802de62c5af57c2d4.docx]

**Table 5.** Linear Mixed-Effects Models comparing Quality of Vision domains of Frequency, Severity and Bothersome in Different Intraocular Lenses.

| **Caracteristics** | **Regression coefficient (CI 95%)** | **p-value** |
| --- | --- | --- |
| **Frequency**  Intraocular lenses |  |  |
| EDOF | — |  |
| Monofocal/Monofocal Premium | 12,6 (-4,93;30,0) | 0,157 |
| Trifocal | 0,70 (-14,4;15,8) | 0,926 |
| Moment |  |  |
| 1. Before surgery | — |  |
| 2. After surgery | -4,19 (-20,1;11,8) | 0,601 |
| Intraocular lenses * Moment |  |  |
| Monofocal/Monofocal Premium * 2. After surgery | -6,80 (-26,6;13,0) | 0,495 |
| Trifocal * 2. After surgery  **Severity**  Intraocular lenses  EDOF  Monofocal/Monofocal Premium  Trifocal  Moment  1. Before surgery  2. After surgery  Intraocular lenses * Moment  Monofocal/Monofocal Premium * 2. After surgery  Trifocal * 2. After surgery  **Bothersome**  Intraocular lenses  EDOF  Monofocal/Monofocal Premium  Trifocal  Moment  1. Before surgery  2. After surgery  Intraocular lenses * Moment  Monofocal/Monofocal Premium * 2. After surgery  Trifocal * 2. After surgery | 10,3 (-6,74;27,4)  —  14,3 (-4,33;32,9)  1,37 (-14,7;17,4)  —  -4,47 (-21,6;12,7)  -9,50 (-30,9;11,8)  9,76 (-8,63;28,1)  —  13,1 (-10,5;36,6)  -1,29 (-21,6;19,0)  —  -8,84 (-29,0;11,3)  -3,70 (-28,8;21,4)  12,8 (-8,80;34,4) | 0,230    0,131  0,866  0,604  0,376  0,292    0,275  0,900  0,384  0,769  0,240 |
| EDOF – Extended depth of focus; CI – Confidence interval | | |
