# Supplementary material for: Assessment of the Impact of Cataract Surgery on Subjective Quality of Vision Across Different Intraocular Lens Type Using the Portuguese-Validated QoV Questionnaire
Source: Research Square preprint supplement (doi:10.21203/rs.3.rs-8855405/v1), 2026-02-19
Supplement: Supplementary file 4 [file a2bbe3f70048959f6177e33c.docx]

Table 2 – Clinical changes before and after cataract surgery

|  | **Moment** | |  |
| --- | --- | --- | --- |
| **Caracteristics** | **1. Before surgery**  N = 58 | **2. After surgery**  N = 58 | **p-value** |
| UDVA |  |  | **0,0021** |
| Mean (SD) | 6,61 (2,56) | 7,79 (2,38) |  |
| Median [Q1, Q3] | 7,50 [5,00, 8,00] | 8,00 [7,00, 10,00] |  |
| UNVA |  |  | **<0,0011** |
| Mean (SD) | 4,43 (3,00) | 7,10 (2,57) |  |
| Median [Q1, Q3] | 3,50 [2,00, 7,00] | 8,00 [5,00, 9,00] |  |
| QOV_Frequency |  |  | 0,8601 |
| Mean (SD) | 25,60 (17,00) | 27,43 (18,12) |  |
| Median [Q1, Q3] | 25,15 [10,86, 35,48] | 24,21 [14,47, 36,16] |  |
| QOV_Severity |  |  | 0,9381 |
| Mean (SD) | 26,62 (18,95) | 27,24 (18,51) |  |
| Median [Q1, Q3] | 23,50 [13,47, 36,72] | 23,46 [13,59, 36,76] |  |
| QOV_Bothersome |  |  | 0,6691 |
| Mean (SD) | 30,23 (23,27) | 29,74 (23,66) |  |
| Median [Q1, Q3] | 25,66 [14,83, 38,11] | 22,65 [11,01, 41,02] |  |
| UDVA OD (logMAR) |  |  | **<0,0011** |
| Mean (SD) | 0,48 (0,37) | 0,06 (0,11) |  |
| Median [Q1, Q3] | 0,40 [0,10, 0,70] | 0,00 [0,00, 0,10] |  |
| UDVA OS (logMAR) |  |  | **<0,0011** |
| Mean (SD) | 0,47 (0,34) | 0,08 (0,11) |  |
| Median [Q1, Q3] | 0,40 [0,20, 0,70] | 0,00 [0,00, 0,10] |  |
| Spherical equivalent OD |  |  | **0,0161** |
| Mean (SD) | 0,41 (2,29) | -0,09 (0,35) |  |
| Median [Q1, Q3] | 0,50 [-0,25, 1,75] | 0,00 [-0,25, 0,00] |  |
| Spherical equivalent OS |  |  | **0,0081** |
| Mean (SD) | 0,46 (2,28) | -0,10 (0,35) |  |
| Median [Q1, Q3] | 0,75 [-0,50, 1,75] | 0,00 [-0,25, 0,00] |  |
| 1Wilcoxon signed rank test with continuity correction  UDVA – Uncorrected distance visual acuity; UNVA – Uncorrected near visual acuity; OD – Right eye; OS – Left eye; QOV – Quality of vision questionnaire | | | |
