# Supplementary material for: Assessment of the Impact of Cataract Surgery on Subjective Quality of Vision Across Different Intraocular Lens Type Using the Portuguese-Validated QoV Questionnaire
Source: Research Square preprint supplement (doi:10.21203/rs.3.rs-8855405/v1), 2026-02-19
Supplement: Supplementary file 5 [file bdf2b2f473a7fff8ec0670ff.docx]

**Table 6.** Quality of Vision (QoV) Questionnaire translated into Brazilian Portuguese.

| **Questions**  Com que frequência você tem ofuscamento na sua visão? [1]  Qual a intensidade deste ofuscamento? [2]  O quanto este ofuscamento te incomoda? [3]  Com que frequência você apresenta halos na visão? [1]  Qual a intensidade dos halos? [2]  O quanto os halos te incomodam? [3]  Com que frequência você apresenta “explosão de estrelas” na visão? [1]  Qual a intensidade dessa “explosão de estrelas”? [2]  O quanto a “explosão de estrelas” te incomoda? [3]  Com que frequência você apresenta visão enevoada? [1]  Qual a intensidade dessa visão enevoada? [2]  O quanto a visão enevoada te incomoda? [3]  Com que frequência você apresenta visão borrada? [1]  Qual a intensidade dessa visão borrada? [2]  O quanto essa visão borrada te incomoda? [3]  Com que frequência você apresenta visão distorcida? [1]  Qual a intensidade dessa visão distorcida? [2]  O quanto essa visão distorcida te incomoda? [3]  Com que frequência você apresenta visão dupla? [1]  Qual a intensidade dessa visão dupla? [2]  O quanto essa visão dupla te incomoda? [3]  Com que frequência você apresenta flutuação da visão? [1]  Qual a intensidade da flutuação da visão? [2]  O quanto a flutuação na visão te incomoda? [3]  Com que frequência você apresenta dificuldade para focar a visão? [1]  Qual a intensidade dessa dificuldade para focar a visão? [2]  O quanto a dificuldade para focar a visão te incomoda? [3]  Com que frequência você apresenta dificuldade para enxergar profundidade e distância? [1]  Qual a intensidade dessa dificuldade para enxergar profundidade e distância? [2]  O quanto essa dificuldade para enxergar profundidade e distância te incomoda? [3]  **Possible response options for frequency questions [1]**  Nunca  Ocasionalmente  Frequentemente  Muito frequentemente  **Possible response options for severity questions [2]**  Nenhuma  Leve  Moderada  Grave  **Possible response options for bothersomeness questions [3]**  Nada  Um pouco  Moderado  Muito |  |  |
| --- | --- | --- |
|  | | |
