# Supplementary material for: Assessment of the Impact of Cataract Surgery on Subjective Quality of Vision Across Different Intraocular Lens Type Using the Portuguese-Validated QoV Questionnaire
Source: Research Square preprint supplement (doi:10.21203/rs.3.rs-8855405/v1), 2026-02-19
Supplement: Supplementary file 7 [file d5bbc8b2f25284239a0d427c.docx]

Table 1 – Clinical and demographic characteristics of the patients included in the study

|  | | **IOL** | | |  |
| --- | --- | --- | --- | --- | --- |
| **Caracteristics** | **Total**  N = 58 | **EDOF**  N = 6 | **Monofocal/**  **Monofocal Premium**  N = 11 | **Trifocal**  N = 41 | **p-value** |
| Participants |  |  |  |  | **<0,0011** |
|  | 58 (100%) | 6 (10,34%) | 11 (18,96%) | 41 (70,68%) |  |
| Age |  |  |  |  | 0,3142 |
| Mean (SD) | 64,53 (7,72) | 69,67 (9,67) | 66,36 (9,24) | 63,29 (6,74) |  |
| Median [Q1, Q3] | 64,00 [60,00, 70,00] | 68,50 [61,00, 74,00] | 64,00 [62,00, 69,00] | 63,00 [58,00, 69,00] |  |
| Gender, n / N (%) |  |  |  |  | 0,6871 |
| Female | 37 / 58 (63,79%) | 3 / 6 (50,00%) | 8 / 11 (72,73%) | 26 / 41 (63,41%) |  |
| Male | 21 / 58 (36,21%) | 3 / 6 (50,00%) | 3 / 11 (27,27%) | 15 / 41 (36,59%) |  |
| Ethnicity, n / N (%) |  |  |  |  | 0,5491 |
| White | 40 / 49 (81,63%) | 3 / 4 (75,00%) | 6 / 8 (75,00%) | 31 / 37 (83,78%) |  |
| Black/mixed race | 9 / 49 (18,37%) | 1 / 4 (25,00%) | 2 / 8 (25,00%) | 6 / 37 (16,22%) |  |
| Education level, n / N (%) |  |  |  |  | 0,0761 |
| Elementary school complete | 8 / 58 (13,79%) | 1 / 6 (16,67%) | 3 / 11 (27,27%) | 4 / 41 (9,76%) |  |
| Elementary school incomplete | 3 / 58 (5,17%) | 0 / 6 (0,00%) | 2 / 11 (18,18%) | 1 / 41 (2,44%) |  |
| Higher education complete | 47 / 58 (81,03%) | 5 / 6 (83,33%) | 6 / 11 (54,55%) | 36 / 41 (87,80%) |  |
| Occupational status, n / N (%) |  |  |  |  | 0,4241 |
| Retired | 36 / 58 (62,07%) | 5 / 6 (83,33%) | 8 / 11 (72,73%) | 23 / 41 (56,10%) |  |
| Economically active | 22 / 58 (37,93%) | 1 / 6 (16,67%) | 3 / 11 (27,27%) | 18 / 41 (43,90%) |  |
| History of refractive surgery, n / N (%) |  |  |  |  | 0,1531 |
| No | 47 / 58 (81,03%) | 4 / 6 (66,67%) | 11 / 11 (100,00%) | 32 / 41 (78,05%) |  |
| Yes | 11 / 58 (18,97%) | 2 / 6 (33,33%) | 0 / 11 (0,00%) | 9 / 41 (21,95%) |  |
| Mesopic pupillary diameter OD |  |  |  |  | 0,4392 |
| Mean (SD) | 4,75 (1,29) | 4,56 (1,04) | 4,51 (0,90) | 4,84 (1,41) |  |
| Median [Q1, Q3] | 4,92 [4,14, 5,52] | 4,53 [3,86, 5,43] | 4,54 [4,12, 5,29] | 5,11 [4,15, 5,59] |  |
| Mesopic pupillary diameter OS |  |  |  |  | 0,1862 |
| Mean (SD) | 4,83 (0,99) | 4,52 (0,98) | 4,46 (1,00) | 4,98 (0,98) |  |
| Median [Q1, Q3] | 4,61 [4,06, 5,68] | 4,17 [3,90, 5,68] | 4,42 [3,61, 5,46] | 4,89 [4,17, 5,75] |  |
| Photopic pupillary diameter OD |  |  |  |  | 0,3542 |
| Mean (SD) | 3,48 (0,84) | 3,44 (1,25) | 3,20 (0,66) | 3,56 (0,82) |  |
| Median [Q1, Q3] | 3,43 [2,89, 3,91] | 3,03 [2,66, 3,43] | 3,41 [2,43, 3,70] | 3,53 [2,96, 4,09] |  |
| Photopic pupillary diameter OS |  |  |  |  | 0,4922 |
| Mean (SD) | 3,52 (0,85) | 3,56 (1,16) | 3,25 (0,70) | 3,59 (0,85) |  |
| Median [Q1, Q3] | 3,41 [2,92, 4,05] | 2,99 [2,93, 3,97] | 3,22 [2,78, 3,87] | 3,55 [2,97, 4,10] |  |
| Cataract LOCS III OD, n / N (%) |  |  |  |  | 0,2411 |
| Nuclear 1 | 20 / 58 (34,48%) | 0 / 6 (0,00%) | 3 / 11 (27,27%) | 17 / 41 (41,46%) |  |
| Nuclear 2 | 26 / 58 (44,83%) | 5 / 6 (83,33%) | 6 / 11 (54,55%) | 15 / 41 (36,59%) |  |
| Others | 12 / 58 (20,69%) | 1 / 6 (16,67%) | 2 / 11 (18,18%) | 9 / 41 (21,95%) |  |
| Cataract LOCS III OS, n / N (%) |  |  |  |  | 0,2411 |
| Nuclear 1 | 19 / 58 (32,76%) | 0 / 6 (0,00%) | 3 / 11 (27,27%) | 16 / 41 (39,02%) |  |
| Nuclear 2 | 28 / 58 (48,28%) | 5 / 6 (83,33%) | 6 / 11 (54,55%) | 17 / 41 (41,46%) |  |
| Others | 11 / 58 (18,96%) | 1 / 6 (16,67%) | 2 / 11 (18,18%) | 8 / 41 (19,52%) |  |
| Femtosecond laser–assisted surgery, n / N (%) | / N (%) |  |  |  | 0,0771 |
| No | 39 / 58 (67,24%) | 6 / 6 (100,00%) | 9 / 11 (81,82%) | 24 / 41 (58,54%) |  |
| Yes | 19 / 58 (32,76%) | 0 / 6 (0,00%) | 2 / 11 (18,18%) | 17 / 41 (41,46%) |  |
| Capsulotomy, n / N (%) |  |  |  |  | 0,7421 |
| No | 39 / 58 (67,24%) | 5 / 6 (83,33%) | 8 / 11 (72,73%) | 26 / 41 (63,41%) |  |
| Yes | 19 / 58 (32,76%) | 1 / 6 (16,67%) | 3 / 11 (27,27%) | 15 / 41 (36,59%) |  |
| Postoperative independence of spectacles, n / N (%) |  |  |  |  | **<0,0011** |
| No | 45 / 58 (77,59%) | 3 / 6 (50,00%) | 2 / 11 (18,18%) | 40 / 41 (97,56%) |  |
| Yes | 13 / 58 (22,41%) | 3 / 6 (50,00%) | 9 / 11 (81,82%) | 1 / 41 (2,44%) |  |
| 1Fisher's exact test | | | | | |
| 2Kruskal-Wallis rank sum test  IOL – Intraocular lenses; EDOF – Extended depth of focus; OD – Right eye; OS – Left eye; SD – Standard deviation | | | | | |
